# Supplementary material for: Cell-Type-Specific Afferent Innervation of the Nucleus Accumbens Core and Shell
Source: Front Neuroanat. 2018 Oct 16;12:84. doi: 10.3389/fnana.2018.00084 (PMC6232828; doi:10.3389/fnana.2018.00084)
Supplement: TABLE S1 — Raw data used for quantification. [file Table_1.XLSX]

## Sheet: Sheet1
	Sample Number	D1-Core-01		D1-Core-02		D1-Core-03		D1-Core-04		D1-Core-05		D1-Core-06		D1R-core		D1-Shell-01		D1-Shell-02		D1-Shell-03		D1-Shell-04		D1-Shell-05		D1-Shell-06		D1R-shell		D2-Core-01		D2-Core-02		D2-Core-03		D2-Core-04		D2-Core-05		D2-Core-06		D2R-core		D2-Shell-01		D2-Shell-02		D2-Shell-03
Brain areas	Brain regions(Abbreviations)	Cell number (inputs)	Percent of total inputs(%)	Cell number (inputs)	Percent of total inputs(%)	Cell number (inputs)	Percent of total inputs(%)	Cell number (inputs)	Percent of total inputs(%)	Cell number (inputs)	Percent of total inputs(%)	Cell number (inputs)	Percent of total inputs(%)	Mean of Percent(%)	SEM	Cell number (inputs)	Percent of total inputs(%)	Cell number (inputs)	Percent of total inputs(%)	Cell number (inputs)	Percent of total inputs(%)	Cell number (inputs)	Percent of total inputs(%)	Cell number (inputs)	Percent of total inputs(%)	Cell number (inputs)	Percent of total inputs(%)	Mean of Percent(%)	SEM	Cell number (inputs)	Percent of total inputs(%)	Cell number (inputs)	Percent of total inputs(%)	Cell number (inputs)	Percent of total inputs(%)	Cell number (inputs)	Percent of total inputs(%)	Cell number (inputs)	Percent of total inputs(%)	Cell number (inputs)	Percent of total inputs(%)	Mean of Percent(%)	SEM	Cell number (inputs)	Percent of total inputs(%)	Cell number (inputs)	Percent of total inputs(%)	Cell number (inputs)	Percent of total inputs(%)
cortex	Frontal association cortex(FrA)	895	1.14462	171	0.518685	75	0.29915	13	0.103199	76	0.50792	122	0.328425	2.902	0.146239	0	0	4	0.0344145	2	0.0258031	4	0.0229056	8	0.0430316	9	0.0450338	0.171189	0.00675852	495	0.690348	216	0.519818	99	0.495471	59	0.288269	63	0.21599	57	0.228274	2.43817	0.07818	0	0	0	0	0	0
	Orbital cortex, ventral/medial(MO/VO)	5299	6.77691	1917	5.81473	2000	7.97734	803	6.37453	882	5.89454	2328	6.26699	39.105	0.324736	409	2.19103	360	3.09731	160	2.06425	570	3.26404	526	2.82933	655	3.27746	16.7234	0.219374	5483	7.64682	2611	6.28354	1143	5.72043	1925	9.40538	1401	4.80321	1946	7.79335	41.6527	0.677988	2	0.0195103	92	1.25409	61	0.697621
	Orbital cortex, lateral/dorsolateral(LO/DL0)	2227	2.84812	636	1.92914	485	1.93451	143	1.13519	270	1.80445	722	1.94363	11.595	0.222905	37	0.198211	23	0.197884	9	0.116114	85	0.486743	69	0.371147	67	0.335251	1.70535	0.0560617	1551	2.16309	948	2.28142	425	2.12702	442	2.15957	387	1.3268	422	1.69003	11.7479	0.151227	13	0.126817	4	0.0545256	3	0.0343092
	Prelimbic cortex(PrL)	3798	4.85727	1560	4.73186	1697	6.76878	605	4.80273	664	4.43761	1539	4.143	29.7413	0.378564	71	0.38035	39	0.335542	143	1.84492	55	0.314952	147	0.790705	144	0.72054	4.38701	0.237833	3316	4.62463	1685	4.05506	787	3.93874	951	4.6465	1134	3.88782	1385	5.54666	26.6994	0.258532	29	0.282899	41	0.558888	43	0.491766
	Infralimbic cortex(IL)	448	0.572949	416	1.26183	170	0.678074	193	1.53211	103	0.688365	434	1.16833	5.90166	0.159326	77	0.412493	90	0.774327	69	0.890208	147	0.84178	162	0.871389	189	0.945709	4.73591	0.0788135	364	0.50765	389	0.936154	112	0.560533	248	1.21171	384	1.31651	210	0.841009	5.37356	0.134721	53	0.517023	49	0.667939	28	0.32022
	Agranular insular cortex(AI)	4699	6.00957	1595	4.83802	1107	4.41546	615	4.88211	849	5.674	1566	4.21568	30.0348	0.286953	64	0.342851	31	0.266713	38	0.490259	145	0.830327	149	0.801463	137	0.685514	3.41713	0.097404	4108	5.72919	2283	5.49419	1796	8.98854	861	4.20677	1157	3.96668	1119	4.48138	32.8667	0.75896	50	0.487757	53	0.722465	28	0.32022
	Dysgranular/granular insular cortex(DI/GI)	1165	1.48992	84	0.254793	56	0.223366	9	0.0714456	64	0.427722	78	0.209977	2.67722	0.213872	0	0	0	0	4	0.0516062	0	0	18	0.096821	6	0.0300225	0.17845	0.0159494	410	0.571803	293	0.705124	137	0.685651	37	0.180779	67	0.229704	53	0.212255	2.58532	0.101784	2	0.0195103	1	0.0136314	1	0.0114364
	Primary motor cortex(M1)	759	0.970688	111	0.33669	16	0.0638188	5	0.039692	42	0.280692	133	0.358037	2.04962	0.137606	1	0.00535705	0	0	0	0	3	0.0171792	9	0.0484105	12	0.060045	0.130992	0.0106661	386	0.538332	240	0.577576	36	0.180171	37	0.180779	107	0.36684	25	0.10012	1.94382	0.0823398	0	0	0	0	1	0.0114364
	Secondary motor cortex(M2)	2466	3.15378	588	1.78355	534	2.12995	43	0.341351	216	1.44356	750	2.01901	10.8712	0.376106	1	0.00535705	1	0.00860363	5	0.0645078	37	0.211877	37	0.199021	38	0.190143	0.679509	0.039985	1524	2.12543	1029	2.47636	182	0.910865	328	1.60258	763	2.61588	578	2.31478	12.0459	0.262351	1	0.00975515	0	0	4	0.0457457
	Primary somatosensory cortex(S1)	442	0.565275	44	0.133463	0	0	3	0.0238152	8	0.0534652	93	0.250357	1.02638	0.0871547	0	0	0	0	0	0	2	0.0114528	1	0.00537895	6	0.0300225	0.0468542	0.00481513	497	0.693137	179	0.430775	17	0.0850808	48	0.234524	67	0.229704	3	0.0120144	1.68524	0.101295	0	0	0	0	0	0
	Secondary somatosensory cortex(S2)	429	0.548649	39	0.118297	6	0.023932	3	0.0238152	9	0.0601484	55	0.14806	0.922902	0.0815949	0	0	2	0.0172073	2	0.0258031	0	0	1	0.00537895	0	0	0.0483893	0.00447426	339	0.472784	256	0.616081	40	0.20019	26	0.127034	16	0.0548546	12	0.0480577	1.519	0.0966181	0	0	0	0	1	0.0114364
	Cingulate cortex(Cg)	1490	1.90557	523	1.58639	895	3.56986	152	1.20664	124	0.828711	758	2.04054	11.1377	0.388309	10	0.0535705	27	0.232298	99	1.27725	93	0.532555	140	0.753053	191	0.955717	3.80445	0.18619	1952	2.72234	876	2.10815	233	1.16611	498	2.43319	1149	3.93925	1009	4.04085	16.4099	0.450965	27	0.263389	28	0.381679	12	0.137237
	Dorsal peduncular cortex(DP)	643	0.822335	186	0.564183	180	0.717961	75	0.59538	163	1.08935	278	0.748378	4.53759	0.0773783	122	0.65356	185	1.59167	49	0.632176	314	1.79809	248	1.33398	210	1.05079	7.06026	0.197408	449	0.626194	390	0.93856	126	0.630599	173	0.845263	197	0.675398	234	0.937125	4.65314	0.0607967	25	0.243879	33	0.449836	13	0.148673
	Ectorhinal cortex(Ect)	2000	2.55781	507	1.53785	351	1.40002	66	0.523934	216	1.44356	468	1.25986	8.72304	0.266531	5	0.0267852	0	0	15	0.193523	12	0.0687167	48	0.258189	37	0.185139	0.732354	0.0425984	977	1.36257	805	1.93728	261	1.30624	211	1.03093	357	1.22394	358	1.43372	8.29468	0.124548	10	0.0975515	6	0.0817884	3	0.0343092
	Perirhinal cortex(PRh)	2610	3.33794	616	1.86848	675	2.69235	105	0.833532	323	2.15866	653	1.75788	12.6488	0.349333	24	0.128569	5	0.0430182	15	0.193523	35	0.200424	67	0.360389	38	0.190143	1.11607	0.0425972	1472	2.05291	1152	2.77236	460	2.30219	286	1.39737	526	1.80335	674	2.69924	13.0274	0.216449	50	0.487757	29	0.395311	15	0.171546
	Auditory cortex(Au)	444	0.567833	67	0.203227	16	0.0638188	17	0.134953	21	0.140346	20	0.0538401	1.16402	0.0780584	0	0	0	0	1	0.0129016	2	0.0114528	0	0	3	0.0150113	0.0393656	0.00297029	249	0.347266	175	0.421149	52	0.260247	24	0.117262	64	0.219419	54	0.21626	1.5816	0.0437572	1	0.00975515	0	0	0	0
	Temporal association cortex(TeA)	922	1.17915	198	0.600582	127	0.506561	42	0.333413	36	0.240593	186	0.500713	3.36101	0.13475	1	0.00535705	2	0.0172073	6	0.0774094	3	0.0171792	10	0.0537895	12	0.060045	0.230987	0.0118579	615	0.857705	404	0.972252	79	0.395376	94	0.459276	194	0.665112	114	0.456548	3.80627	0.0973627	2	0.0195103	0	0	1	0.0114364
	Entorhinal cortex(Ent)	1921	2.45677	712	2.15967	632	2.52084	192	1.52417	312	2.08514	1172	3.15503	13.9016	0.221395	369	1.97675	285	2.45203	88	1.13534	296	1.69501	348	1.87187	303	1.51614	10.6471	0.181754	2166	3.02079	1205	2.89991	380	1.90181	644	3.14653	839	2.87644	411	1.64598	15.4915	0.260627	148	1.44376	162	2.20829	119	1.36093
Olfactory areas	Olfactory bulb(OB)	55	0.0703397	14	0.0424654	0	0	16	0.127014	9	0.0601484	30	0.0807602	0.380728	0.0171898	6	0.0321423	3	0.0258109	1	0.0129016	21	0.120254	0	0	2	0.0100075	0.201116	0.0179682	10	0.0139464	13	0.0312853	10	0.0500475	1	0.00488591	60	0.205705	0	0	0.30587	0.0318453	0	0	0	0	1	0.0114364
	Anterior olfactory nucleus(AON)	6032	7.71434	1719	5.21415	1505	6.00295	532	4.22323	1139	7.61211	1927	5.1875	35.9543	0.576547	115	0.61606	121	1.04104	20	0.258031	233	1.33425	75	0.403421	223	1.11584	4.76864	0.175874	3191	4.4503	2116	5.09229	659	3.29813	1154	5.63834	1449	4.96777	1320	5.28634	28.7332	0.338136	11	0.107307	10	0.136314	15	0.171546
	Claustrium/endopiriform(Cl/DEn)	1521	1.94521	412	1.2497	340	1.35615	72	0.571565	316	2.11188	930	2.50357	9.73806	0.284857	52	0.278566	18	0.154865	27	0.348342	70	0.400848	94	0.505621	54	0.270203	1.95845	0.0493337	1037	1.44624	850	2.04558	299	1.49642	513	2.50647	472	1.61821	285	1.14137	10.2543	0.199493	19	0.185348	18	0.245365	42	0.480329
	Piriform cortex(Pir)	6077	7.77189	1826	5.5387	1002	3.99665	528	4.19147	1390	9.28958	2909	7.83105	38.6194	0.888204	332	1.77854	81	0.696894	24	0.309637	487	2.78875	215	1.15647	238	1.19089	7.92119	0.356838	5042	7.03178	3632	8.74064	1653	8.27286	1040	5.08135	1795	6.154	962	3.85262	39.1333	0.765599	12	0.117062	17	0.231734	26	0.297347
	Nucleus of the lateral olfactory tract(LOT)	301	0.38495	43	0.13043	47	0.187468	55	0.436612	73	0.48787	84	0.226129	1.85346	0.0598812	25	0.133926	21	0.180676	2	0.0258031	47	0.26914	16	0.0860631	23	0.115086	0.810695	0.034057	217	0.302637	112	0.269535	62	0.310295	7	0.0342014	70	0.239989	97	0.388466	1.54512	0.0490885	0	0	0	0	1	0.0114364
	Amygdalopiriform transition area(APir)	1009	1.29041	897	2.72082	424	1.6912	170	1.34953	199	1.32995	765	2.05939	10.4413	0.230155	691	3.70172	378	3.25217	108	1.39337	330	1.88971	461	2.47969	381	1.90643	14.6231	0.362217	1189	1.65823	567	1.36452	306	1.53145	143	0.698686	374	1.28223	348	1.39367	7.92879	0.135888	286	2.78997	147	2.00382	547	6.25572
	Tenia tecta(DTT/VTT)	399	0.510282	101	0.306358	62	0.247298	38	0.301659	82	0.548018	303	0.815678	2.72929	0.0876633	544	2.91423	756	6.50434	69	0.890208	1096	6.27613	786	4.22785	947	4.73855	25.5513	0.865996	226	0.315189	210	0.505379	85	0.425404	149	0.728001	146	0.500549	88	0.352423	2.82694	0.0601446	41	0.399961	27	0.368048	36	0.411711
striatum	Caudate putamen(CPU)	568	0.726417	337	1.0222	33	0.131626	51	0.404858	45	0.300742	270	0.726842	3.31269	0.134608	11	0.0589275	7	0.0602254	71	0.916011	8	0.0458111	100	0.537895	35	0.175131	1.794	0.145129	1112	1.55084	673	1.61962	611	3.05791	147	0.718229	437	1.49822	71	0.284341	8.72915	0.388189	8	0.0780412	33	0.449836	11	0.125801
	Olfactory tubercle(Tu)	117	0.149632	38	0.115263	0	0	5	0.039692	5	0.0334158	160	0.430721	0.768724	0.0646526	307	1.64461	198	1.70352	11	0.141917	126	0.721526	126	0.677747	71	0.355266	5.24459	0.267628	0	0	143	0.344139	14	0.0700666	197	0.962525	66	0.226275	27	0.10813	1.71114	0.144302	25	0.243879	11	0.149945	20	0.228728
pallidum	Ventral pallidum(VP)	1212	1.55003	571	1.73198	540	2.15388	683	5.42193	446	2.98069	1022	2.75123	16.5897	0.578005	1084	5.80704	840	7.22705	467	6.02503	706	4.04283	811	4.36233	888	4.44333	31.9076	0.506225	1523	2.12404	893	2.14906	770	3.85366	594	2.90223	859	2.94501	527	2.11053	16.0845	0.283571	550	5.36533	433	5.9024	463	5.29506
	Lateral globus pallidus(GP)	124	0.158584	146	0.442854	10	0.0398867	12	0.0952608	14	0.0935641	50	0.1346	0.96475	0.0587882	0	0	1	0.00860363	0	0	0	0	0	0	0	0	0.00860363	0.00143394	111	0.154805	148	0.356172	78	0.390371	10	0.0488591	27	0.0925672	9	0.0360433	1.07882	0.0636377	1	0.00975515	0	0	0	0
	Bed nucleus of the stria terminalis(BST)	586	0.749437	1736	5.26571	941	3.75334	769	6.10463	476	3.18118	823	2.21552	21.2698	0.801478	206	1.10355	125	1.07545	173	2.23197	199	1.13955	103	0.554032	212	1.0608	7.16535	0.225823	1542	2.15054	985	2.37047	763	3.81863	65	0.317584	696	2.38618	889	3.56027	14.6037	0.508317	33	0.32192	67	0.913304	86	0.983532
	IPAC(IPAC)	178	0.227645	96	0.291191	64	0.255275	48	0.381043	39	0.260643	75	0.201901	1.6177	0.0255047	10	0.0535705	14	0.120451	0	0	7	0.0400848	1	0.00537895	4	0.020015	0.2395	0.0181241	98	0.136675	132	0.317667	75	0.375357	17	0.0830605	46	0.157707	97	0.388466	1.45893	0.0542876	0	0	0	0	5	0.0571821
Amygdala	Anterior amygdaloid area(AAD/AAV)	159	0.203346	33	0.100097	25	0.0997168	10	0.079384	17	0.113614	79	0.212669	0.808826	0.0236057	25	0.133926	29	0.249505	4	0.0516062	90	0.515375	35	0.188263	32	0.16012	1.2988	0.0654218	47	0.0655482	69	0.166053	20	0.100095	10	0.0488591	40	0.137137	37	0.148178	0.66587	0.0192721	1	0.00975515	0	0	1	0.0114364
	Basomedial amygdaloid nucleus(BM)	1874	2.39666	1232	3.73696	635	2.53281	520	4.12797	454	3.03415	1107	2.98005	18.8086	0.276302	358	1.91782	115	0.989418	93	1.19985	138	0.790242	244	1.31246	234	1.17088	7.38067	0.156586	2329	3.24812	1496	3.60022	592	2.96281	626	3.05858	1000	3.42841	546	2.18662	18.4848	0.202698	121	1.18037	143	1.94929	167	1.90988
	Basolateral amygdaloid nucleus(BL)	3104	3.96972	1228	3.72482	814	3.24678	535	4.24704	549	3.66905	1546	4.16184	23.0193	0.150601	649	3.47672	190	1.63469	372	4.79938	374	2.14167	685	3.68458	762	3.81286	19.5499	0.475915	3104	4.32897	1612	3.87938	1066	5.33507	715	3.49343	981	3.36327	987	3.95274	24.3529	0.291473	514	5.01414	447	6.09324	538	6.15279
	Central nucleus(Ce)	51	0.0652241	203	0.615749	122	0.486618	48	0.381043	13	0.086881	83	0.223437	1.85895	0.0907219	6	0.0321423	7	0.0602254	2	0.0258031	0	0	2	0.0107579	6	0.0300225	0.158951	0.00843049	230	0.320768	34	0.0818232	72	0.360342	4	0.0195437	39	0.133708	136	0.544654	1.46084	0.0813769	5	0.0487757	0	0	7	0.0800549
	Lateral amygdaloid nucleus(La)	874	1.11776	420	1.27396	240	0.957281	226	1.79408	238	1.59059	386	1.03911	7.77279	0.135134	15	0.0803557	13	0.111847	25	0.322539	11	0.0629903	32	0.172126	18	0.0900676	0.839926	0.0396343	946	1.31933	465	1.11905	252	1.2612	295	1.44134	463	1.58736	255	1.02123	7.74951	0.0845504	2	0.0195103	7	0.0954198	27	0.308783
	Medial nucleus(Me)	53	0.0677819	49	0.148629	21	0.0837621	26	0.206398	15	0.100247	59	0.158828	0.765647	0.0215056	83	0.444635	66	0.56784	5	0.0645078	133	0.76161	47	0.25281	49	0.245184	2.33659	0.103028	97	0.13528	42	0.101076	34	0.170162	25	0.122148	34	0.116566	26	0.104125	0.749357	0.0103804	4	0.0390206	1	0.0136314	6	0.0686185
	Cortex-amygdala transition zone(CxA)	1007	1.28786	266	0.806843	119	0.474652	111	0.881162	270	1.80445	283	0.761838	6.0168	0.192709	27	0.14464	17	0.146262	2	0.0258031	44	0.251961	21	0.112958	23	0.115086	0.796711	0.0298198	739	1.03064	574	1.38137	382	1.91182	67	0.327356	185	0.634257	105	0.420505	5.70594	0.250693	0	0	0	0	5	0.0571821
	Cortical amygdaloid nucleus(Co)	57	0.0728975	87	0.263892	46	0.183479	29	0.230214	45	0.300742	123	0.331117	1.38234	0.0379571	183	0.98034	93	0.800138	3	0.0387047	94	0.538281	34	0.182884	75	0.375281	2.91563	0.147196	10	0.0139464	129	0.310447	57	0.285271	29	0.141692	56	0.191991	51	0.204245	1.14759	0.043631	4	0.0390206	2	0.0272628	12	0.137237
	Amygdalohippocampal area(AHi)	498	0.636894	306	0.928173	261	1.04104	91	0.722394	33	0.220544	334	0.89913	4.44818	0.120017	286	1.53212	199	1.71212	42	0.541866	99	0.566913	183	0.984347	310	1.55116	6.88853	0.212929	418	0.58296	166	0.39949	151	0.755718	17	0.0830605	108	0.370269	293	1.17341	3.36491	0.153224	21	0.204858	24	0.327154	43	0.491766
Hippocampus	Septohippocampal nucleus(SHi)	2	0.00255781	2	0.00606649	0	0	6	0.0476304	0	0	41	0.110372	0.166627	0.0181352	61	0.32678	160	1.37658	13	0.16772	192	1.09947	114	0.6132	119	0.595447	4.1792	0.187825	3	0.00418393	2	0.00481313	2	0.0100095	36	0.175893	21	0.0719967	0	0	0.266896	0.0285134	11	0.107307	0	0	1	0.0114364
	Field CA1 of hippocampus(CA1)	487	0.622826	124	0.376122	633	2.52483	65	0.515996	217	1.45024	619	1.66635	7.15637	0.342283	1873	10.0337	700	6.02254	620	7.99897	856	4.90179	1480	7.96084	2109	10.5529	47.4708	0.896616	934	1.3026	67	0.16124	62	0.310295	733	3.58137	565	1.93705	580	2.32279	9.61535	0.528635	1189	11.5989	560	7.63359	453	5.1807
	Subiculum(S)	5982	7.6504	2882	8.74181	3862	15.4043	976	7.74788	1446	9.66384	4492	12.0925	61.3007	1.23276	3548	19.0068	1920	16.519	2321	29.9445	3524	20.1798	4419	23.7696	4925	24.6435	134.063	1.95652	6635	9.25345	2560	6.16081	633	3.16801	2436	11.9021	3906	13.3914	3926	15.7229	59.5986	1.91326	3867	37.7231	2695	36.7366	3031	34.6638
Septum/Diagonal band of Broca(DB)	Lateral septal nucleus, intermediate part(LSI)	49	0.0626663	43	0.13043	15	0.0598301	18	0.142891	0	0	79	0.212669	0.608486	0.0307979	358	1.91782	413	3.5533	187	2.41259	1092	6.25322	861	4.63127	726	3.63272	22.4009	0.638725	90	0.125518	24	0.0577576	5	0.0250238	18	0.0879465	24	0.082282	18	0.0720865	0.450614	0.0136333	161	1.57058	85	1.15867	99	1.1322
	Lateral septal nucleus, dorsal part(LSD)	1	0.0012789	18	0.0545984	8	0.0319094	12	0.0952608	1	0.00668315	23	0.0619162	0.251647	0.0146052	928	4.97134	590	5.07614	79	1.01922	657	3.76224	618	3.32419	839	4.19815	22.3513	0.607895	2	0.00278928	5	0.0120328	6	0.0300285	12	0.058631	10	0.0342841	6	0.0240288	0.161795	0.0079199	228	2.22417	92	1.25409	281	3.21363
	Lateral septal nucleus, ventral part(LSV)	2	0.00255781	65	0.197161	23	0.0917395	12	0.0952608	0	0	33	0.0888362	0.475555	0.0297598	205	1.09819	104	0.894778	63	0.812798	176	1.00785	149	0.801463	132	0.660495	5.27557	0.0640403	20	0.0278928	5	0.0120328	10	0.0500475	4	0.0195437	8	0.0274273	30	0.120144	0.257088	0.0163102	57	0.556043	34	0.463468	35	0.400274
	Medial septal nucleus(MS)	31	0.039646	45	0.136496	0	0	17	0.134953	0	0	36	0.0969123	0.408007	0.02586	188	1.00712	265	2.27996	56	0.722487	468	2.67995	277	1.48997	317	1.58619	9.76568	0.303199	4	0.00557857	23	0.055351	9	0.0450428	12	0.058631	19	0.0651399	1	0.00400481	0.233748	0.0111268	49	0.478002	21	0.28626	43	0.491766
	VDB	18	0.0230203	12	0.0363989	0	0	7	0.0555688	3	0.0200495	25	0.0673002	0.202338	0.010084	300	1.60711	319	2.74456	54	0.696684	295	1.68929	232	1.24792	282	1.41106	9.39662	0.276091	11	0.0153411	6	0.0144394	5	0.0250238	12	0.058631	22	0.0754251	0	0	0.18886	0.011905	42	0.409716	30	0.408942	40	0.457457
	HDB	173	0.22125	28	0.0849308	44	0.175502	12	0.0952608	22	0.147029	93	0.250357	0.974329	0.0271519	187	1.00177	191	1.64329	32	0.41285	514	2.94337	183	0.984347	239	1.1959	8.18152	0.354997	48	0.0669428	63	0.151614	15	0.0750713	60	0.293155	93	0.318843	57	0.228274	1.1339	0.0441683	17	0.165837	5	0.068157	12	0.137237
Thalamus	Paraventricular thalamic nucleus(PVA)	2590	3.31236	1510	4.5802	878	3.50205	870	6.90641	784	5.23959	1570	4.22645	27.7671	0.539363	1499	8.03021	617	5.30844	879	11.3405	872	4.99341	1109	5.96525	911	4.55842	40.1962	1.05323	2572	3.58702	1581	3.80478	555	2.77764	871	4.25563	1188	4.07296	1037	4.15298	22.651	0.22313	1324	12.9158	898	12.241	1292	14.7758
	Paratenial thalamic nucleus(PT)	1102	1.40935	566	1.71682	336	1.34019	457	3.62785	231	1.54381	485	1.30562	10.9436	0.365995	459	2.45888	143	1.23032	112	1.44497	110	0.629903	254	1.36625	136	0.68051	7.81084	0.271174	1161	1.61918	800	1.92525	263	1.31625	538	2.62862	649	2.22504	399	1.59792	11.3123	0.195514	131	1.27792	110	1.49945	124	1.41812
	Mediodorsal thalamic nucleus(MD)	1328	1.69838	1064	3.22737	388	1.5476	570	4.52489	357	2.38589	665	1.79018	15.1743	0.472253	226	1.21069	135	1.16149	122	1.57399	42	0.240509	199	1.07041	81	0.405304	5.6624	0.209475	1947	2.71537	1202	2.89269	1112	5.56529	465	2.27195	839	2.87644	430	1.72207	18.0438	0.54318	135	1.31694	121	1.6494	149	1.70403
	Intermediodorsal thalamic nucleus(IMD)	936	1.19705	592	1.79568	182	0.725938	111	0.881162	159	1.06262	237	0.638006	6.30046	0.171375	3	0.0160711	4	0.0344145	11	0.141917	8	0.0458111	23	0.123716	8	0.04003	0.40196	0.0213395	725	1.01112	568	1.36693	270	1.35128	122	0.596081	184	0.630828	143	0.572687	5.52893	0.153102	15	0.146327	5	0.068157	7	0.0800549
	Central medial thalamic nucleus(CM)	1696	2.16902	649	1.96858	447	1.78294	286	2.27038	249	1.6641	674	1.81441	11.6694	0.0964078	121	0.648203	60	0.516218	145	1.87073	37	0.211877	157	0.844495	112	0.56042	4.65194	0.234638	1323	1.84511	762	1.8338	453	2.26715	356	1.73939	464	1.59078	511	2.04646	11.3227	0.0973073	163	1.59009	130	1.77208	121	1.38381
	Paracentral thalamic nucleus(PC)	179	0.228924	224	0.679447	141	0.562403	31	0.24609	67	0.447771	169	0.454949	2.61958	0.0718066	44	0.23571	1	0.00860363	51	0.65798	3	0.0171792	61	0.328116	22	0.110083	1.35767	0.100238	377	0.52578	233	0.56073	115	0.575547	236	1.15308	200	0.685683	198	0.792952	4.29377	0.0962453	39	0.380451	38	0.517993	15	0.171546
	Centrolateral thalamic nucleus(CL)	509	0.650962	177	0.536884	219	0.873519	49	0.388982	31	0.207178	203	0.546478	3.204	0.0925492	11	0.0589275	2	0.0172073	28	0.361244	5	0.028632	44	0.236674	8	0.04003	0.742714	0.0579554	684	0.953935	212	0.510192	101	0.50548	198	0.967411	308	1.05595	245	0.981177	4.97415	0.102589	15	0.146327	7	0.0954198	2	0.0228728
	Reuniens thalamic nucleus(Re)	707	0.904185	310	0.940306	186	0.741893	265	2.10368	218	1.45693	416	1.11988	7.26686	0.204379	168	0.899984	102	0.87757	69	0.890208	102	0.584092	140	0.753053	129	0.645484	4.65039	0.0557125	802	1.1185	426	1.0252	224	1.12107	211	1.03093	336	1.15195	270	1.0813	6.52894	0.0211023	143	1.39499	141	1.92203	141	1.61253
	Rhomboid thalamic nucleus(Rh)	197	0.251944	94	0.285125	34	0.135615	17	0.134953	40	0.267326	169	0.454949	1.52991	0.0482053	8	0.0428564	0	0	9	0.116114	3	0.0171792	18	0.096821	3	0.0150113	0.287982	0.0194865	98	0.136675	83	0.199745	62	0.310295	21	0.102604	38	0.13028	50	0.20024	1.07984	0.0306135	1	0.00975515	12	0.163577	1	0.0114364
	Parafascicular thalamic nucleus(PF)	1083	1.38505	614	1.86241	472	1.88265	411	3.26268	238	1.59059	710	1.91133	11.8947	0.269497	247	1.32319	109	0.937796	203	2.61902	184	1.05366	241	1.29633	153	0.765574	7.99556	0.271506	1287	1.7949	917	2.20682	574	2.87273	534	2.60908	661	2.26618	289	1.15739	12.9071	0.249077	221	2.15589	154	2.09924	136	1.55535
	Interanteromedial thalamic nucleus(IAM)	200	0.255781	154	0.46712	120	0.478641	19	0.15083	45	0.300742	74	0.199209	1.85232	0.0559023	57	0.305352	0	0	13	0.16772	9	0.0515375	10	0.0537895	4	0.020015	0.598414	0.0474821	446	0.62201	223	0.536664	110	0.550523	208	1.01627	255	0.874246	175	0.700841	4.30055	0.0782748	11	0.107307	6	0.0817884	0	0
Hypothalamus	Medial preoptic area(MPA)	30	0.0383671	89	0.269959	50	0.199434	40	0.317536	12	0.0801978	45	0.12114	1.02663	0.0448689	108	0.578561	78	0.671083	38	0.490259	141	0.807421	108	0.580926	166	0.830623	3.95887	0.0555772	73	0.101809	22	0.0529444	20	0.100095	9	0.0439732	28	0.0959956	42	0.168202	0.563019	0.0180703	14	0.136572	22	0.299891	42	0.480329
	Lateral preoptic area(LPO)	88	0.112543	84	0.254793	44	0.175502	45	0.357228	51	0.340841	123	0.331117	1.57202	0.0407973	219	1.17319	127	1.09266	63	0.812798	199	1.13955	177	0.952074	189	0.945709	6.11599	0.056599	166	0.231511	121	0.291194	94	0.470447	39	0.190551	86	0.294844	45	0.180216	1.65876	0.0435315	55	0.536533	43	0.58615	55	0.629003
	Substantia innominata(SI)	263	0.336352	256	0.776511	57	0.227354	129	1.02405	165	1.10272	230	0.619162	4.08615	0.145265	213	1.14105	172	1.47982	39	0.503161	244	1.39724	181	0.973589	159	0.795597	6.29046	0.150908	497	0.693137	363	0.873583	200	1.00095	123	0.600967	231	0.791964	48	0.192231	4.15283	0.11496	35	0.34143	30	0.408942	38	0.434584
	Magnocellular preoptic nucleus(MCPO)	218	0.278801	16	0.0485319	28	0.111683	7	0.0555688	27	0.180445	110	0.296121	0.97115	0.0442363	39	0.208925	45	0.387163	2	0.0258031	138	0.790242	34	0.182884	35	0.175131	1.77015	0.109632	60	0.0836785	87	0.209371	6	0.0300285	51	0.249182	75	0.257131	53	0.212255	1.04165	0.0383677	0	0	1	0.0136314	1	0.0114364
	Anterior hypothalamic area(AHA)	28	0.0358093	60	0.181995	7	0.0279207	14	0.111138	8	0.0534652	27	0.0726842	0.483012	0.0236598	64	0.342851	44	0.37856	24	0.309637	51	0.292046	76	0.4088	74	0.370278	2.10217	0.0180022	42	0.058575	11	0.0264722	6	0.0300285	3	0.0146577	12	0.041141	12	0.0480577	0.218932	0.00648573	21	0.204858	20	0.272628	20	0.228728
	Medial preoptic nucleus(MPO)	17	0.0217414	56	0.169862	28	0.111683	31	0.24609	0	0	44	0.118448	0.667825	0.0374422	44	0.23571	35	0.301127	16	0.206425	58	0.332131	49	0.263568	32	0.16012	1.49908	0.0256416	64	0.0892571	15	0.0360985	19	0.0950903	0	0	14	0.0479978	47	0.188226	0.45667	0.0266377	4	0.0390206	11	0.149945	11	0.125801
	Lateral hypothalamic area(LH)	322	0.411807	412	1.2497	129	0.514539	139	1.10344	56	0.374256	235	0.632622	4.28636	0.151854	688	3.68565	608	5.23101	120	1.54819	804	4.60402	722	3.8836	746	3.7328	22.6853	0.509486	459	0.640141	257	0.618487	131	0.655623	111	0.542336	135	0.462836	95	0.380457	3.29988	0.0448603	105	1.02429	84	1.14504	81	0.926349
	Parasubthalamic nucleus(PSTh)	0	0	73	0.221427	22	0.0877508	38	0.301659	15	0.100247	50	0.1346	0.845684	0.0434734	45	0.241067	8	0.068829	9	0.116114	29	0.166065	11	0.0591684	16	0.08006	0.731304	0.0286864	0	0	56	0.134768	42	0.2102	21	0.102604	39	0.133708	7	0.0280336	0.609313	0.0314433	3	0.0292654	1	0.0136314	12	0.137237
	Zona incerta(ZI)	302	0.386229	208	0.630915	158	0.63021	68	0.539811	39	0.260643	96	0.258433	2.70624	0.0706839	3	0.0160711	7	0.0602254	10	0.129016	9	0.0515375	2	0.0107579	1	0.00500375	0.272611	0.0190972	318	0.443496	151	0.363391	92	0.460437	94	0.459276	119	0.407981	176	0.704846	2.83943	0.0487204	6	0.0585309	10	0.136314	0	0
	Dorsomedial hypothalamic nucleus(DM)	29	0.0370882	37	0.11223	3	0.011966	12	0.0952608	3	0.0200495	20	0.0538401	0.330435	0.0166251	30	0.160711	22	0.18928	23	0.296736	37	0.211877	25	0.134474	44	0.220165	1.21324	0.0229699	29	0.0404446	6	0.0144394	14	0.0700666	3	0.0146577	10	0.0342841	11	0.0440529	0.217945	0.00850059	15	0.146327	5	0.068157	15	0.171546
	Ventromedial thalamic nucleus(VM)	69	0.0882443	130	0.394322	76	0.303139	32	0.254029	6	0.0400989	65	0.17498	1.25481	0.0546201	51	0.273209	44	0.37856	17	0.219327	69	0.395121	101	0.543274	66	0.330248	2.13974	0.0459368	147	0.205012	23	0.055351	17	0.0850808	4	0.0195437	26	0.0891388	109	0.436524	0.89065	0.0629824	10	0.0975515	3	0.0408942	11	0.125801
	Arcuate hypothalamic nucleus(Arc)	28	0.0358093	90	0.272992	31	0.123649	36	0.285782	3	0.0200495	71	0.191133	0.929414	0.046809	57	0.305352	32	0.275316	12	0.154819	47	0.26914	39	0.209779	41	0.205154	1.41956	0.0228627	97	0.13528	12	0.0288788	21	0.1051	7	0.0342014	29	0.099424	16	0.0640769	0.466961	0.0173198	4	0.0390206	5	0.068157	8	0.0914913
	Posterior hypothalamic area(PH)	178	0.227645	144	0.436787	59	0.235332	8	0.0635072	0	0	120	0.323041	1.28631	0.0659819	182	0.974983	74	0.636669	27	0.348342	177	1.01357	165	0.887526	280	1.40105	5.26214	0.146086	197	0.274744	124	0.298414	103	0.51549	61	0.298041	70	0.239989	0	0	1.62668	0.0672494	43	0.419471	26	0.354417	27	0.308783
	Mammillary nucleus(MM)	57	0.0728975	23	0.0697646	6	0.023932	4	0.0317536	4	0.0267326	60	0.16152	0.386601	0.0213351	4	0.0214282	21	0.180676	2	0.0258031	22	0.125981	31	0.166747	24	0.12009	0.640726	0.0279552	27	0.0376553	22	0.0529444	16	0.0800761	13	0.0635169	19	0.0651399	10	0.0400481	0.339381	0.00662853	1	0.00975515	0	0	0	0
Midbrain	Ventral tegmental area(VTA)	400	0.511561	131	0.397355	51	0.203422	39	0.309598	99	0.661632	92	0.247665	2.33123	0.0707431	64	0.342851	42	0.361352	8	0.103212	39	0.223329	68	0.365768	29	0.145109	1.54162	0.047397	283	0.394684	146	0.351359	55	0.275261	43	0.210094	65	0.222847	62	0.248298	1.70254	0.0301885	18	0.175593	9	0.122683	16	0.182983
	Substantia nigra, compact part(SNC)	134	0.171373	105	0.318491	21	0.0837621	34	0.269906	60	0.400989	113	0.304197	1.54872	0.0462759	30	0.160711	10	0.0860363	19	0.24513	7	0.0400848	20	0.107579	24	0.12009	0.759631	0.0287213	152	0.211986	75	0.180492	77	0.385366	42	0.205208	68	0.233132	23	0.0921105	1.3083	0.0390278	10	0.0975515	9	0.122683	10	0.114364
	Rostral linear nucleus of the raphe(RLi)	37	0.0473194	13	0.0394322	0	0	1	0.0079384	0	0	21	0.0565322	0.151222	0.0103948	6	0.0321423	10	0.0860363	2	0.0258031	15	0.0858959	2	0.0107579	10	0.0500375	0.290673	0.0129318	23	0.0320768	9	0.0216591	1	0.00500475	9	0.0439732	9	0.0308557	0	0	0.13357	0.00691696	3	0.0292654	3	0.0408942	1	0.0114364
	Dorsal raphe nucleus(DR)	90	0.115101	60	0.181995	26	0.103705	25	0.19846	51	0.340841	47	0.126524	1.06663	0.0360911	48	0.257138	18	0.154865	3	0.0387047	19	0.108801	16	0.0860631	29	0.145109	0.790682	0.0303899	161	0.224537	42	0.101076	54	0.270257	18	0.0879465	25	0.0857104	17	0.0680817	0.837608	0.0348601	2	0.0195103	6	0.0817884	4	0.0457457
	Median raphe nucleus(MR)	16	0.0204625	6	0.0181995	0	0	2	0.0158768	5	0.0334158	13	0.0349961	0.122951	0.00524046	18	0.0964268	9	0.0774327	7	0.0903109	25	0.14316	12	0.0645474	24	0.12009	0.591968	0.0117309	4	0.00557857	8	0.0192525	0	0	3	0.0146577	11	0.0377126	3	0.0120144	0.0892158	0.00534364	2	0.0195103	1	0.0136314	1	0.0114364
	Periaqueductal gray(PAG)	5	0.00639452	20	0.0606649	0	0	6	0.0476304	0	0	4	0.010768	0.125458	0.0107741	9	0.0482134	13	0.111847	3	0.0387047	22	0.125981	25	0.134474	13	0.0650488	0.524268	0.0170377	19	0.0264982	6	0.0144394	9	0.0450428	1	0.00488591	4	0.0137137	0	0	0.10458	0.00665485	3	0.0292654	2	0.0272628	1	0.0114364
	Pedunculopontine tegmental nucleus(PPTg)	38	0.0485983	19	0.0576316	0	0	5	0.039692	0	0	13	0.0349961	0.180918	0.0100468	10	0.0535705	10	0.0860363	7	0.0903109	9	0.0515375	56	0.301221	52	0.260195	0.842871	0.0451348	56	0.0780999	21	0.0505379	10	0.0500475	8	0.0390873	11	0.0377126	0	0	0.255485	0.0103758	1	0.00975515	3	0.0408942	7	0.0800549
	Retrorubral field(RRF)	15	0.0191835	8	0.024266	14	0.0558414	6	0.0476304	6	0.0400989	2	0.00538401	0.192404	0.00776912	12	0.0642846	1	0.00860363	3	0.0387047	7	0.0400848	6	0.0322737	2	0.0100075	0.193959	0.00853054	27	0.0376553	2	0.00481313	15	0.0750713	2	0.00977183	9	0.0308557	9	0.0360433	0.194211	0.0102261	3	0.0292654	6	0.0817884	3	0.0343092
Hindbrain	Locus coeruleus(LC)	15	0.0191835	12	0.0363989	0	0	2	0.0158768	0	0	9	0.0242281	0.0956873	0.00579066	9	0.0482134	6	0.0516218	2	0.0258031	7	0.0400848	6	0.0322737	11	0.0550413	0.253038	0.00469641	11	0.0153411	6	0.0144394	8	0.040038	1	0.00488591	1	0.00342841	0	0	0.0781328	0.00595835	1	0.00975515	2	0.0272628	3	0.0343092
	Parabrachial nucleus(PB)	28	0.0358093	13	0.0394322	0	0	4	0.0317536	0	0	21	0.0565322	0.163527	0.00928174	17	0.0910698	6	0.0516218	2	0.0258031	23	0.131707	11	0.0591684	19	0.0950713	0.454441	0.0153742	51	0.0711267	9	0.0216591	9	0.0450428	1	0.00488591	7	0.0239989	0	0	0.166713	0.0108391	2	0.0195103	5	0.068157	2	0.0228728
Total		78192	100	32968	100	25071	100	12597	100	14963	100	37147	100	600	0	18667	100	11623	100	7751	100	17463	100	18591	100	19985	100	600	0	71703	100	41553	100	19981	100	20467	100	29168	100	24970	100	600	0	10251	100	7336	100	8744	100
[truncated: 8 more columns]
